# Supplementary material for: Developmental cell death of cortical projection neurons is controlled by a Bcl11a/Bcl6‐dependent pathway
Source: PubMed Central journal article supplement — EMBO Rep. 2022 Jun 29;23(8):e54104. doi: 10.15252/embr.202154104 (PMC9346488; doi:10.15252/embr.202154104), 2022-06-29
Supplement: EMBR-23-e54104-s007.pdf [file EMBR-23-e54104-s007.pdf]

## Expanded View Figures

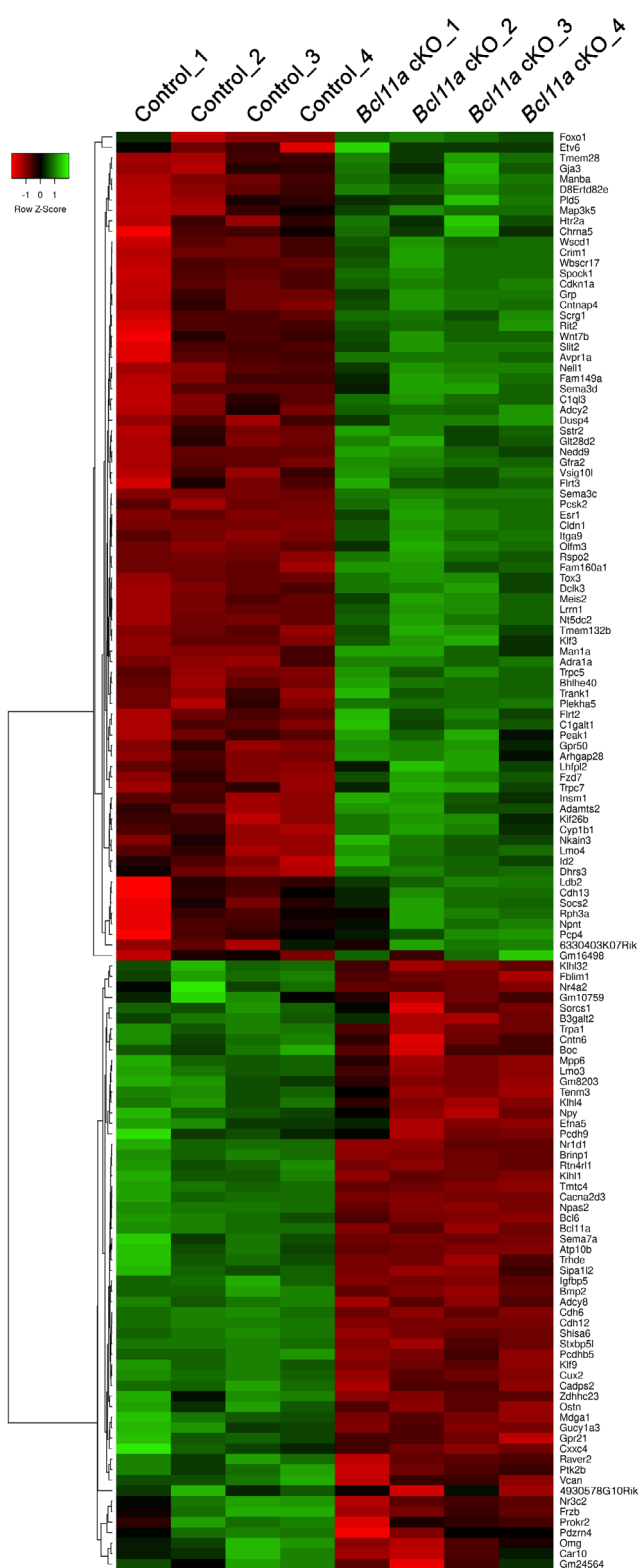

**Figure EV1. Heat map of differentially expressed genes in upper layers of P2 *Bcl11a<sup>Fl/F</sup>;Emx1<sup>iresCre</sup>* compared with control neocortex.**

Heat map showing 79 upregulated genes (green) and 58 downregulated genes (red) in upper neocortical layers of conditional *Emx1<sup>iresCre</sup>;Bcl11a<sup>Fl/F</sup>* mutants (*Bcl11a* cKO) compared with controls at postnatal day 2.

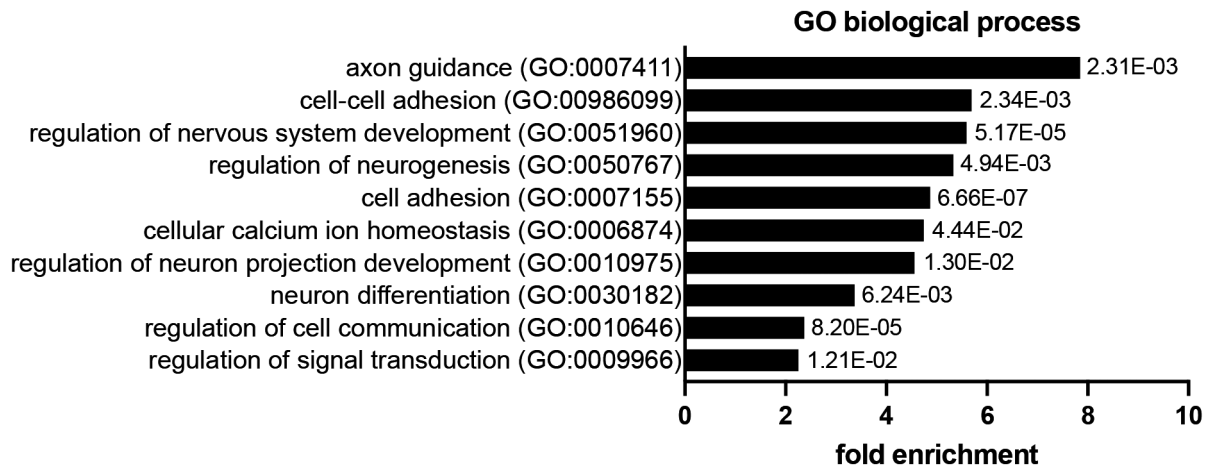

**Figure EV2. Gene ontology enrichment analysis of differentially expressed genes in upper layers of P2 *Bcl11a*<sup>FF</sup>;*Emx1*<sup>IRESCre</sup> compared with control neocortex.**

Graph shows selected GO terms for biological process, GO term accession numbers, fold enrichment, and *P*-value. Data were obtained by GO overrepresentation test using PANTHER.

**Figure EV3. Selected candidate downstream target genes of *Bcl11a* in superficial cortical layers at early postnatal development.**

- A Volcano plot showing differentially expressed (DE) genes in laser-microdissected cortical layers 2–4 of *Bcl11a*<sup>FF</sup>;*Emx1*<sup>IRESCre</sup> neocortex compared with controls. DE genes not significantly changed (fold change < 1.5; *P* > 0.05) are shaded black. *Cdh6*, *Cdh12*, *EfnA5*, *Pcdh9*, *Cdh13*, *Flrt2*, *Flrt3*, and *Slit2* are highlighted in green.
- B Relative mRNA expression levels of selected DE genes determined by quantitative real-time PCR in laser-microdissected cortical tissue of P2 *Bcl11a*<sup>FF</sup>;*Emx1*<sup>IRESCre</sup> and control brains (*n* = 4). Graph represents mean ± s.e.m.; Student's *t*-test; \**P* < 0.05; \*\**P* < 0.01; \*\*\**P* < 0.001.
- C RNA *in situ* hybridization of selected DE genes with decreased expression in P2 *Bcl11a*<sup>FF</sup>;*Emx1*<sup>IRESCre</sup> compared with control neocortex.
- D RNA *in situ* hybridization of selected DE genes with increased expression in P2 *Bcl11a*<sup>FF</sup>;*Emx1*<sup>IRESCre</sup> compared with control neocortex.

Data information: Scale bar, 50 μm.

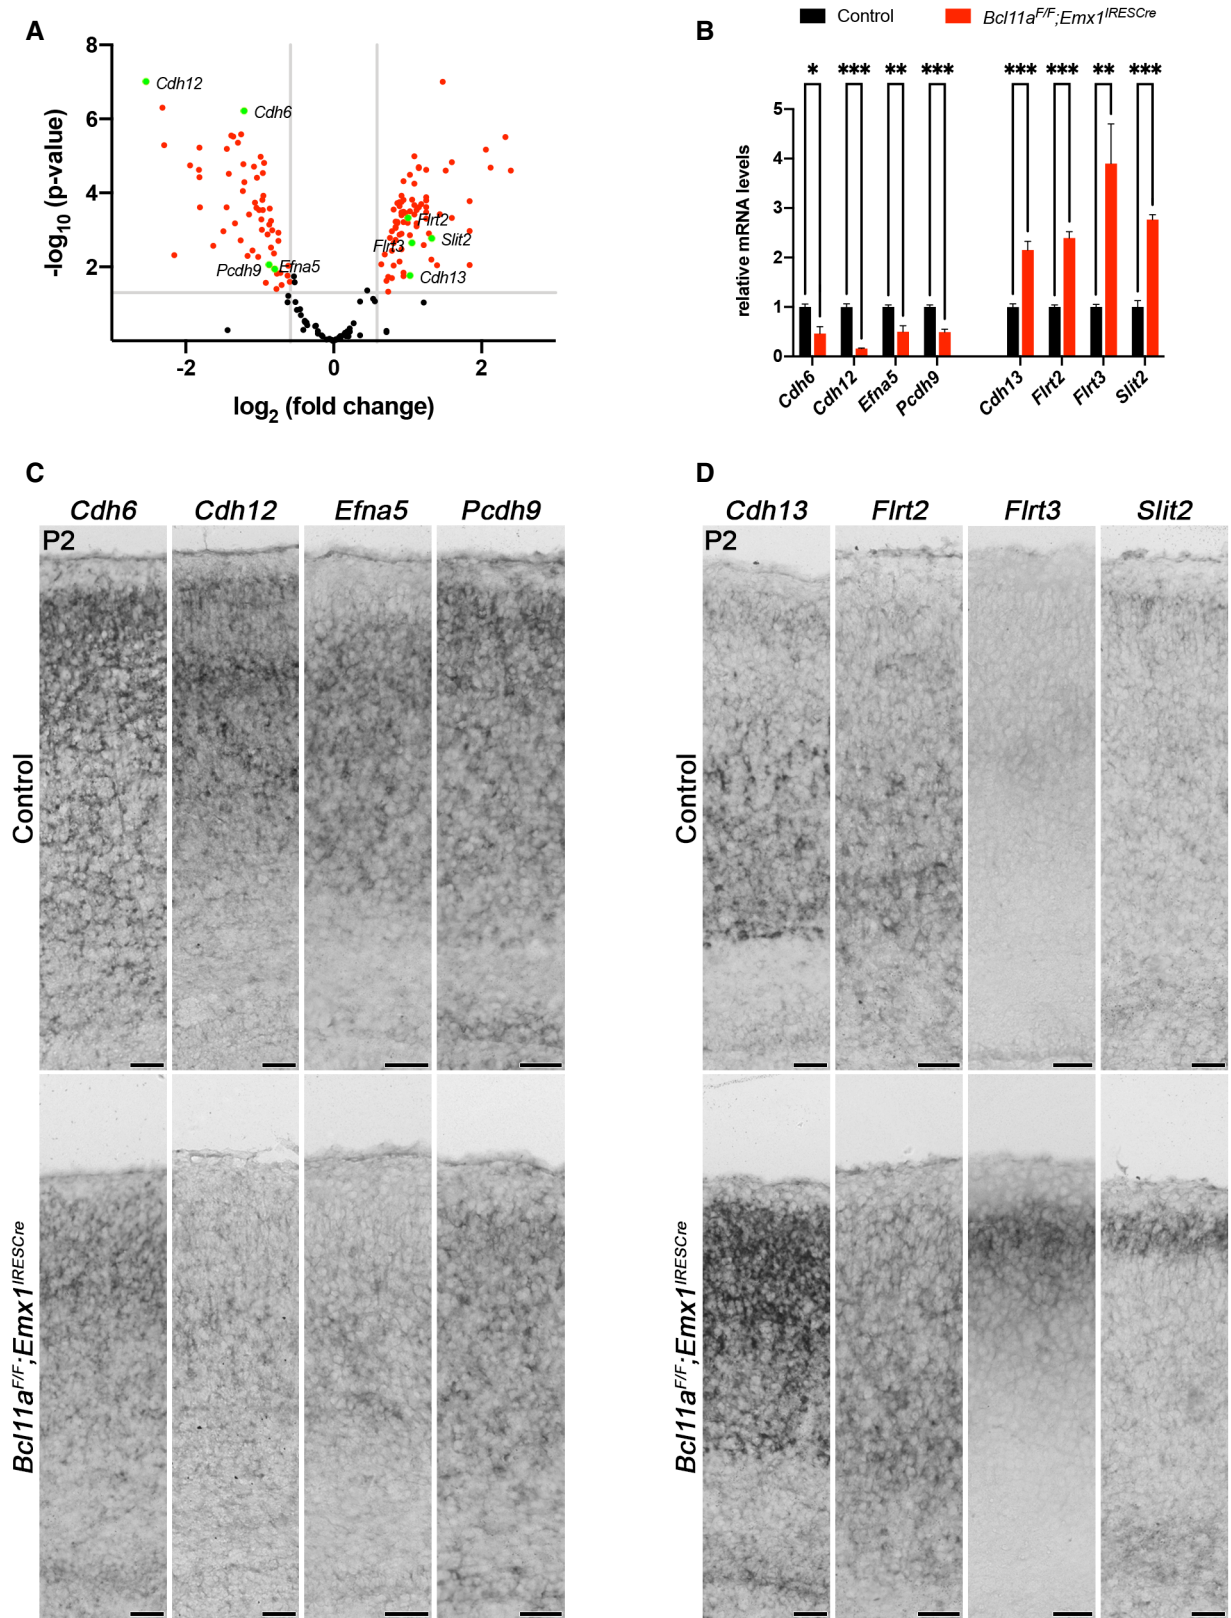

Figure EV3.

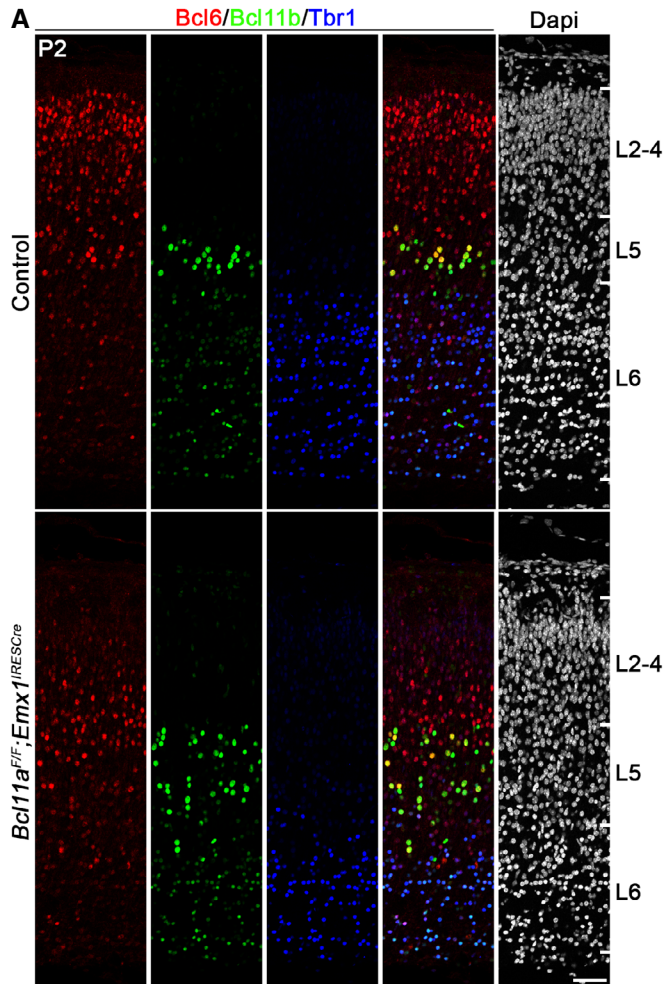

**Figure EV4. Relative Bcl6 expression is unchanged in deep cortical layers of *Bcl11a<sup>Fl/Fl</sup>;Emx1<sup>iresCre</sup>* compared with control neocortex.**

**A** Immunohistochemistry of Bcl6 (red), Bcl11b (green), and Tbr1 (blue) in P2 *Bcl11a<sup>Fl/Fl</sup>;Emx1<sup>iresCre</sup>* and control neocortex. Bcl6 and Tbr1 expressions are downregulated, while Bcl11b expression is upregulated in *Bcl11a<sup>Fl/Fl</sup>;Emx1<sup>iresCre</sup>* compared with control neocortex. Nuclei are stained with Dapi (white).

**B** Relative quantification of Bcl6<sup>+</sup>, Bcl11b<sup>+</sup>, and Tbr1<sup>+</sup> cells in *Bcl11a<sup>Fl/Fl</sup>;Emx1<sup>iresCre</sup>* and control neocortex ( $n = 4$ ).

**C** Numbers of Bcl11b<sup>+</sup> or Tbr1<sup>+</sup> cells that coexpress Bcl6 are normal in *Bcl11a<sup>Fl/Fl</sup>;Emx1<sup>iresCre</sup>* compared with control neocortex ( $n = 4$ ).

Data information: All graphs represent mean  $\pm$  s.e.m.; Student's *t*-test; \*\* $P < 0.01$ , \*\*\* $P < 0.001$ . Scale bar, 50  $\mu$ m.

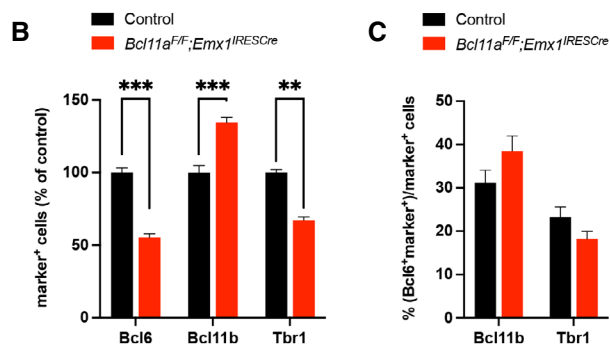

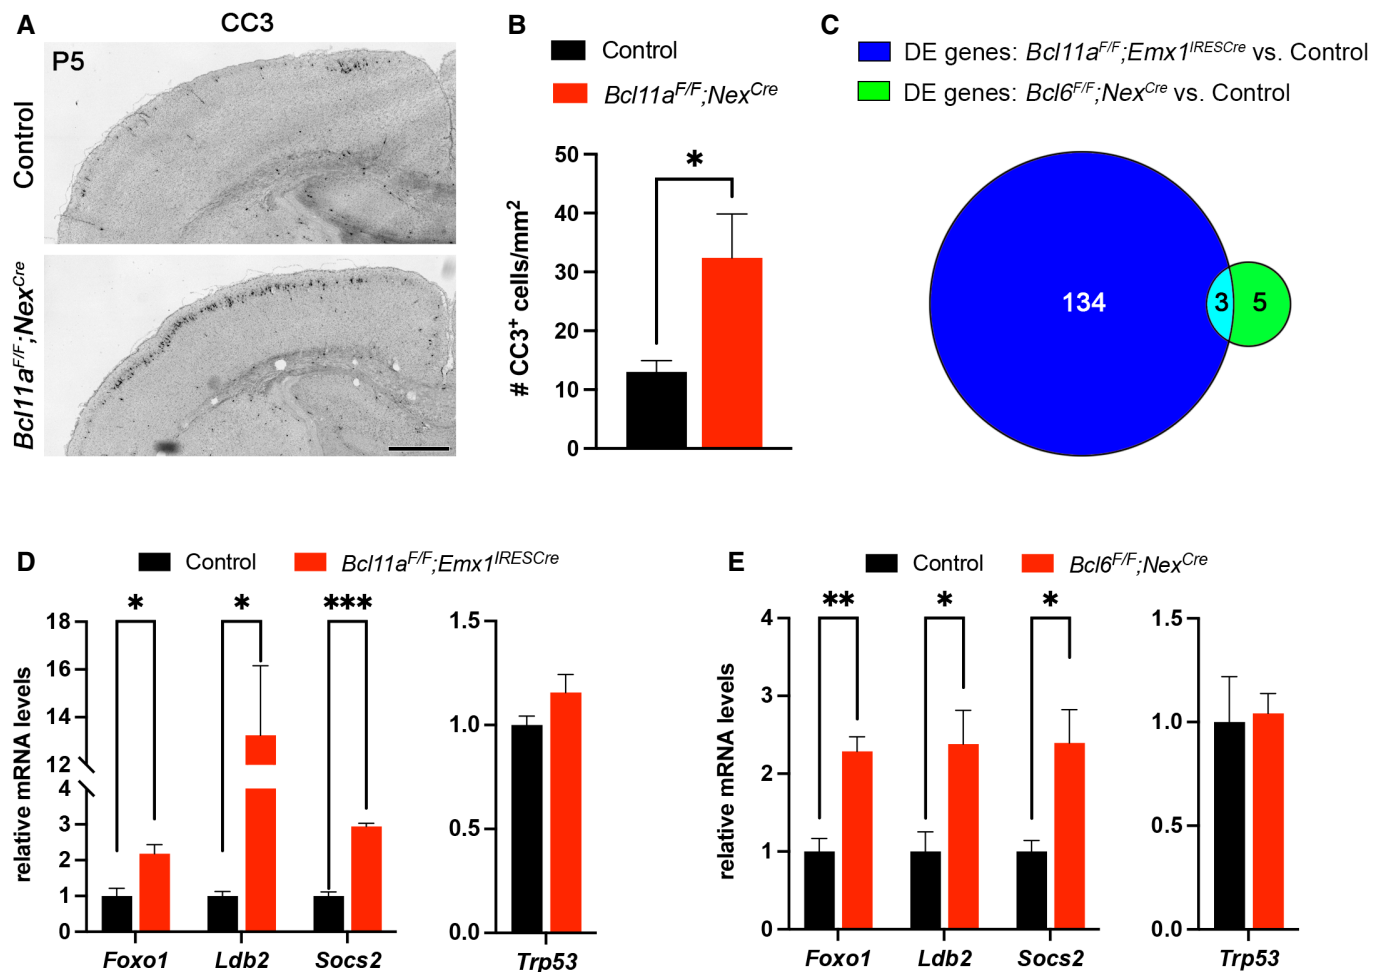

**Figure EV5.** Increased cell death in *Bcl11a<sup>F/F</sup>;Nex<sup>Cre</sup>* and overlapping differentially expressed genes in upper cortical layers of *Bcl11a<sup>F/F</sup>;Emx1<sup>iresCre</sup>* and *Bcl6<sup>F/F</sup>;Nex<sup>Cre</sup>* compared with controls.

- A Immunohistochemistry of cleaved caspase 3 (CC3) shows that the number of CC3<sup>+</sup> cells is increased in P5 *Bcl11a<sup>F/F</sup>;Nex<sup>Cre</sup>* compared with control neocortex.  
 B Quantification of the experiment shown in (A).  
 C Venn diagram showing the number of overlapping differentially expressed (DE) genes in P2 *Bcl11a<sup>F/F</sup>;Emx1<sup>iresCre</sup>* and P5 *Bcl6<sup>F/F</sup>;Nex<sup>Cre</sup>* upper cortical layers.  
 D, E Relative mRNA expression levels of the overlapping DE genes *Foxo1*, *Ldb2*, and *Socs2* as well as *Trp53* determined by quantitative real-time PCR in laser-microdissected cortical tissue of P2 *Bcl11a<sup>F/F</sup>;Emx1<sup>iresCre</sup>* compared with control brains (D) or P5 *Bcl6<sup>F/F</sup>;Nex<sup>Cre</sup>* compared with control brains (E).

Data information: All graphs represent mean ± s.e.m.; n = 4; Student's t-test; \*P < 0.05; \*\*P < 0.01; \*\*\*P < 0.001. Scale bar, 500 μm.
