# Supplementary material for: Developmental cell death of cortical projection neurons is controlled by a Bcl11a/Bcl6‐dependent pathway
Source: PubMed Central journal article supplement — EMBO Rep. 2022 Jun 29;23(8):e54104. doi: 10.15252/embr.202154104 (PMC9346488; doi:10.15252/embr.202154104), 2022-06-29
Supplement: EMBR-23-e54104-s008.pdf [file EMBR-23-e54104-s008.pdf]

## Appendix

### **Developmental cell death of cortical projection neurons is controlled by a Bcl11a/Bcl6-dependent pathway**

Wiegreffe C., Wahl T., Joos N., S., Bonnefont J., Liu P., and Britsch, S.

#### **Table of content**

|                          |        |
|--------------------------|--------|
| Appendix Figure S1 ..... | page 2 |
| Appendix Figure S2 ..... | page 3 |
| Appendix Figure S3 ..... | page 4 |
| Appendix Figure S4 ..... | page 5 |

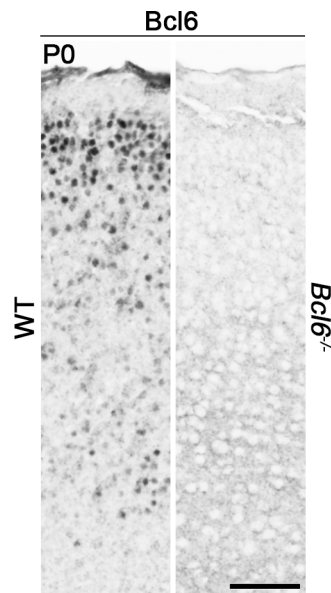

**Appendix Figure S1. Specificity of Bcl6 antibody shown by immunohistochemistry**

Immunohistochemistry of Bcl6 using guinea pig anti-Bcl6 antibody in P0 *Bcl6*<sup>-/-</sup> and wildtype neocortex. Bcl6 expression is detectable in upper layers and at lower levels in deep layers of wildtype neocortex. In *Bcl6*<sup>-/-</sup> mutants Bcl6 expression is not detectable. Scale bar, 50  $\mu$ m.

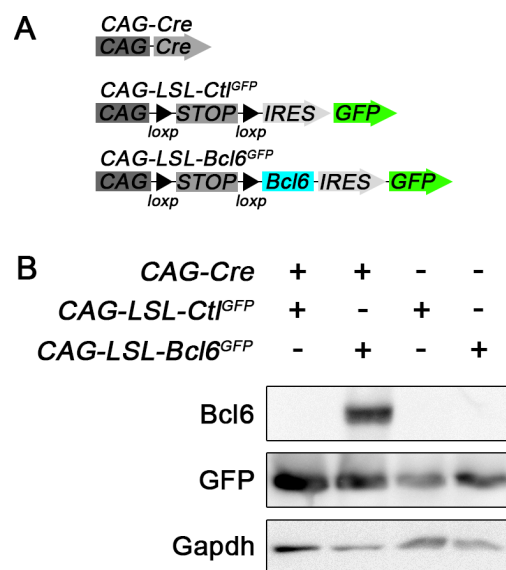

**Appendix Figure S2. Western blot analysis of Cre-dependent DNA plasmids for overexpression of Bcl6 cDNA**

(A) DNA plasmids used for transfection of HEK293 cells.

(B) Western blot analysis of total protein lysates shows that *CAG-LSL-Bcl6<sup>GFP</sup>* plasmid expresses *Bcl6* only in the presence *CAG-Cre* plasmid. Note that GFP is expressed independent of *CAG-Cre*. Gapdh served as protein loading control.

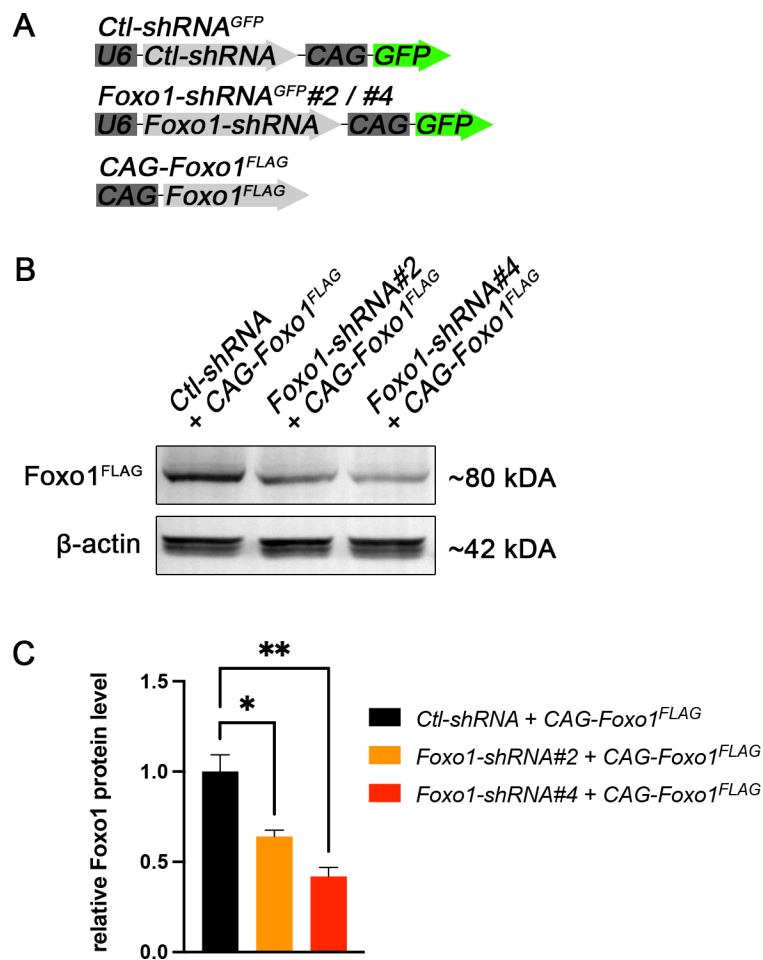

### Appendix Figure S3. *In vitro* knockdown of *Foxo1* by shRNA

(A) DNA plasmids used for transfection of HEK293 cells.

(B) Western blot analysis of HEK293 cell co-transfected as indicated and probed using anti-FLAG and anti-β-actin antibodies. Foxo1-shRNA#2 and #4 reduce Foxo1 expression to a different extent (shRNA#2 < shRNA#4) 48 h after transfection.

(C) Quantification of the experiment shown in (B). The experiment was independently repeated 3 times. Results are expressed as mean ± s.e.m.; one-way ANOVA followed by Tukey's post hoc test; \* p < 0.05; \*\* p < 0.01.

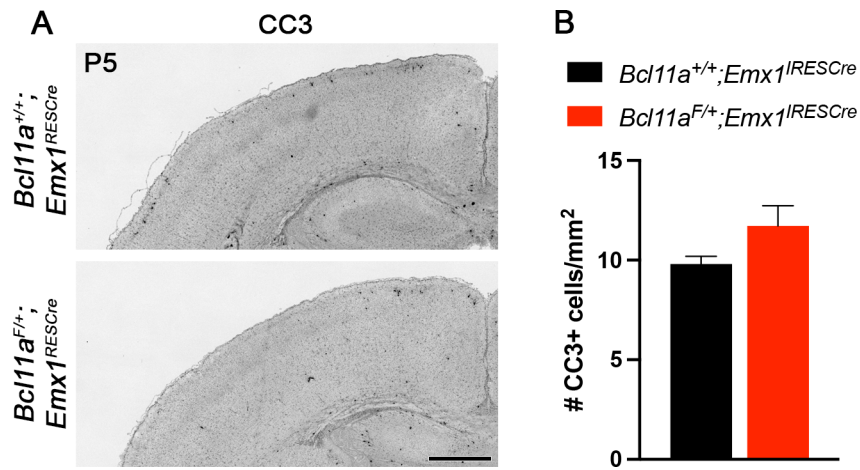

**Appendix Figure S4. Unchanged cell death in *Bcl11a*<sup>F/+</sup>;*Emx1*<sup>IRESCre</sup> compared to *Bcl11a*<sup>+/+</sup>;*Emx1*<sup>IRESCre</sup> neocortex**

(A) Immunohistochemistry of cleaved caspase 3 (CC3) shows that the number of CC3<sup>+</sup> cells is unchanged in P5 *Bcl11a*<sup>+/+</sup>;*Emx1*<sup>IRESCre</sup> compared to *Bcl11a*<sup>F/+</sup>;*Emx1*<sup>IRESCre</sup> neocortex.

(B) Quantification of the experiment shown in (A) (n = 4). Results are expressed as mean ± s.e.m.; Student's t test; \* p < 0.05. Scale bar, 500 μm.
